# Supplementary material for: Duckweeds as Promising Food Feedstocks Globally
Source: Preprints.org preprint supplement (doi:10.20944/preprints202201.0067.v1), 2022-01-06

**Supplemental Figure 1. Systematic Reviews (PRISMA) flow-chart with literature search and study selection.**


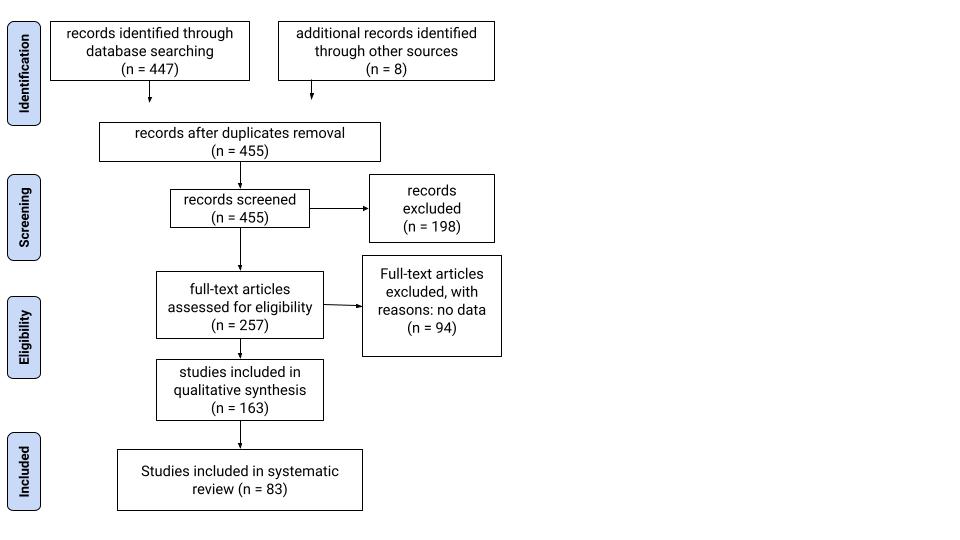

Supplement: Supplementary file 1 [file Supplemental Figure 1.docx]
