# Supplementary material for: Duckweeds as Promising Food Feedstocks Globally
Source: Preprints.org preprint supplement (doi:10.20944/preprints202201.0067.v1), 2022-01-06

**Supplemental Figure 2.** **Amino acids levels in duckweeds by the percentage of biomass.** A. Alanine (% dry weight), B. Arginine (% dry weight), C. Asparagine (% dry weight), D. Aspartic acid (% dry weight), E. Citrulline (% dry weight), F. Cysteine (% dry weight), G. Gamma-aminobutyric acid (% dry weight), H. Glutamine (% dry weight), I. Glutamic acid(% dry weight), J. Glycine (% dry weight), K. Histidine (% dry weight), L. Isoleucine (% dry weight), M. Leucine (% dry weight), N. Lysine (% dry weight), O. Methionine (% dry weight), P. Ornithine (% dry weight), Q. Phenylalanine (% dry weight), R. Proline (% dry weight), S. Serine (% dry weight), T. Threonine (% dry weight), U. Tripthophan (% dry weight), V. Tyrosine (% dry weight), X. Valine (% dry weight), W. Alanine+Tyrosine (% dry weight), Y. Glycine+Serine (% dry weight), Z. Methionine+cysteine (% dry weight), AA. Phenylalanine+Tyrosine (% dry weight).


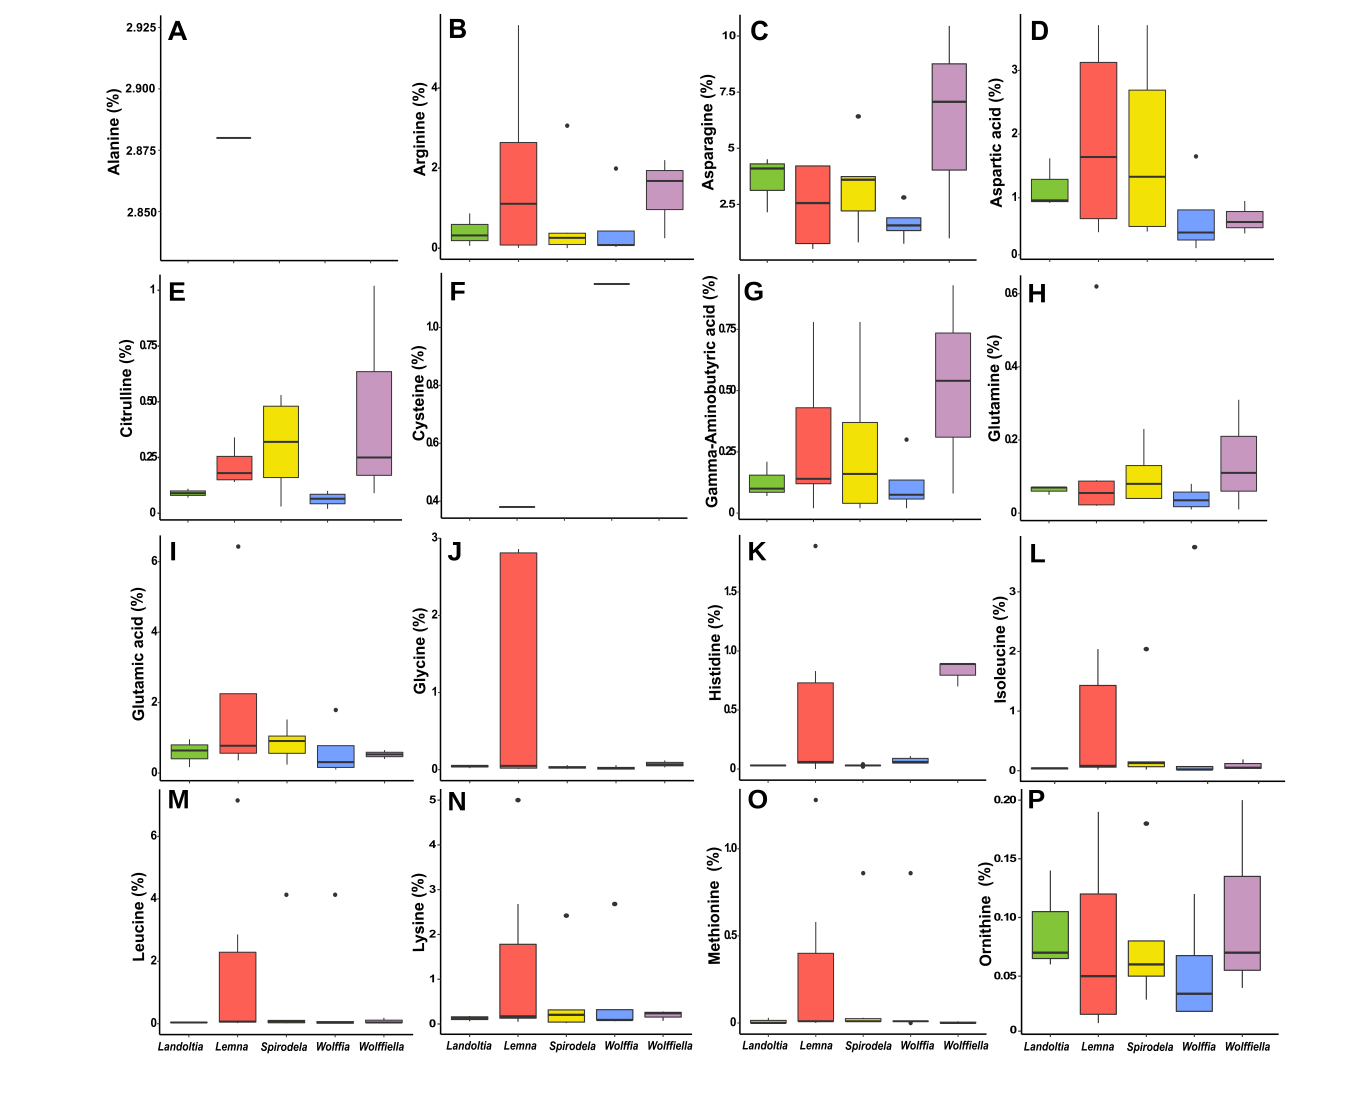


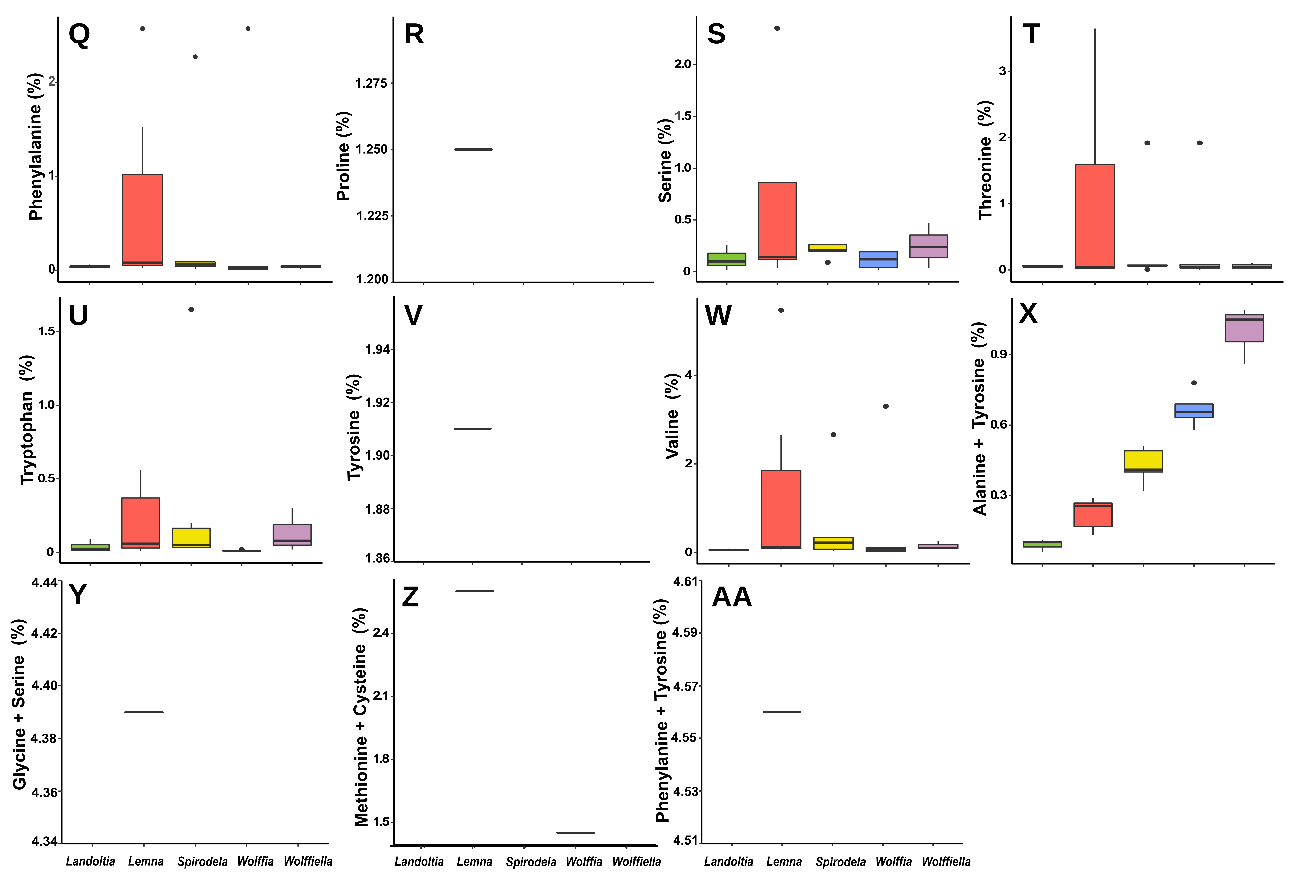

Supplement: Supplementary file 2 [file Supplemental Figure 2.docx]
