# Supplementary material for: Duckweeds as Promising Food Feedstocks Globally
Source: Preprints.org preprint supplement (doi:10.20944/preprints202201.0067.v1), 2022-01-06
Supplement: Supplementary file 3 [file Supplemental table 1.docx]

**Supplementary Table 1. Selected works used for data extraction recovered from the systematic review.**
