# Supplementary material for: Duckweeds as Promising Food Feedstocks Globally
Source: Preprints.org preprint supplement (doi:10.20944/preprints202201.0067.v1), 2022-01-06
Supplement: Supplementary file 5 [file Tables final.xlsx]

## Sheet: Composition
Species	%N			%C			C/N			Protein			% Soluble sugars			% Fiber			%Total aminoacids
Lemnoideae
Spirodela polyrhiza 7498	4.54255	±	0.032588	38.1312	±	0.118352	6.62954	±	0.0380373	28.3909	±	0.032588	47.3636	±	0.498396	52.6364	±	0.498396	11.8016	±	6.81366
Spirodela polyrhiza 9346	5.31193	±	0.0197333	37.7709	±	0.166786	6.63216	±	0.0152002	33.1996	±	0.0197333	46.4177	±	0.441102	53.5823	±	0.441102	9.15289	±	5.28442
Spirodela polyrhiza 9509	5.54996	±	0.032588	36.7895	±	0.118352	9.00393	±	0.0448016	34.6872	±	0.032588	50.4053	±	0.329536	49.5947	±	0.329536	15.1417	±	8.74207
Spirodela polyrhiza 9264	4.04775	±	0.00827868	37.8544	±	0.216871	7.90631	±	0.0942714	25.2984	±	0.00827868	46.0687	±	1.10595	53.9313	±	1.10595	2.53886	±	1.46581
Spirodela intermedia 7355	4.58045	±	0.0139632	38.1097	±	0.0683768	7.96661	±	0.0219068	28.6278	±	0.0139632	46.5508	±	0.391857	53.4492	±	0.391857	9.33317	±	5.38851
Landoltia punctata 7488	6.12218	±	0.0221982	39.7924	±	0.155769	6.99314	±	0.085312	38.2636	±	0.0221982	47.5186	±	0.941966	52.4814	±	0.941966	7.78636	±	4.49546
Landoltia punctata 7624	4.3361	±	0.0183734	39.0387	±	0.0386006	8.82344	±	0.0207316	27.1006	±	0.0183734	52.9976	±	0.373063	47.0024	±	0.373063	6.05432	±	3.49546
Landoltia punctata 7776	4.86619	±	0.0498673	36.1897	±	0.169453	8.48609	±	0.0952519	30.4137	±	0.0498673	53.0232	±	0.819948	46.9768	±	0.819948	5.51673	±	3.18508
Lemna yungensis 9208	4.60293	±	0.0576954	36.3711	±	0.105963	9.35171	±	0.0365481	28.7683	±	0.0576954	53.8535	±	0.49171	46.1465	±	0.49171	3.20483	±	1.85031
Lemna minor 8627	4.2925	±	0.0377059	38.2921	±	0.129441	7.23609	±	0.0302354	26.8281	±	0.0377059	51.123	±	1.02373	48.877	±	1.02373	8.98651	±	5.18836
Lemna gibba DWC112	5.35936	±	0.0472847	37.4637	±	0.186057	8.32047	±	0.0352297	33.496	±	0.0472847	50.6914	±	0.613292	49.3086	±	0.613292	18.187	±	10.5003
Lemna gibba DWC128	4.7806	±	0.036947	37.3676	±	0.207767	8.76704	±	0.0214853	29.8788	±	0.036947	48.4006	±	1.00899	51.5994	±	1.00899	9.98566	±	5.76522
Lemna japonica 8695	4.18516	±	0.0132303	39.0948	±	0.155339	8.78489	±	0.0717936	26.1572	±	0.0132303	50.6566	±	0.698901	49.3434	±	0.698901	3.54495	±	2.04668
Lemna obscura 9342	4.2043	±	0.0158778	37.0955	±	0.10726	9.34131	±	0.0237105	26.2769	±	0.0158778	55.8982	±	0.724068	44.1018	±	0.724068	1.77443	±	1.02447
Average Lemnoideae	4.77014			37.8115			8.1602			29.8134			50.0692			49.9308			8.07207
Wolffioideae
Wolffiella neotropica 8848	4.23374	±	0.0316947	37.185	±	0.15122	8.40331	±	0.134736	26.4609	±	0.0316947	51.4342	±	0.630152	48.5658	±	0.630152	2.67751	±	1.54586
Wolffiella caudata 9139	5.664	±	0.00918475	37.5647	±	0.113676	7.40841	±	0.0582538	35.4	±	0.00918475	54.5039	±	0.693024	45.4961	±	0.693024	18.5622	±	10.7169
Wolffiella gladiata 8261	4.57673	±	0.0501769	38.82	±	0.107752	7.4394	±	0.066862	28.6045	±	0.0501769	48.6366	±	0.837094	51.3634	±	0.837094	16.1101	±	9.30115
Wolffia borealis 9144	4.60498	±	0.0167883	36.6848	±	0.0687918	7.81759	±	0.0496367	28.7811	±	0.0167883	50.7115	±	0.842924	49.2885	±	0.842924	2.75345	±	1.5897
Wolffia globosa 884	5.10038	±	0.0172288	36.906	±	0.159102	7.11122	±	0.0510353	31.8773	±	0.0172288	50.2942	±	0.943741	49.7058	±	0.943741	15.934	±	9.19951
Wolffia globosa 8973	4.50676	±	0.0144678	39.51	±	0.0851302	6.49969	±	0.0068903	28.1672	±	0.0144678	53.402	±	0.493098	46.598	±	0.493098	1.14886	±	0.663293
Wolffia arrhiza 8853	4.97776	±	0.0265788	36.8713	±	0.107937	8.9233	±	0.0803629	31.111	±	0.0265788	51.3478	±	1.57458	48.6522	±	1.57458	2.98677	±	1.72441
Average Wolffioideae	4.80919			37.6488			7.65756			30.0575			51.4757			48.5243			8.59613
p-value	2*10-16			2*10-16			2*10-16			2*10-16			2*10-16			2*10-16			1.42*10-15
	4.78257			37.7598			8.00027			29.891			50.5167			49.4833

## Sheet: NSC 
	NON-STRUCTURAL CARBOHYDRATES (µg.mg-1 DW)
Species	Glucose			Fructose			Sucrose			Raffinose			Starch
Lemnoideae
Spirodela polyrhiza 7498	1.36795	±	0.151749	6.28798	±	0.64608	0.427984	±	0.121457	0.169145	±	0.0371471	40.5445	±	2.25497
Spirodela polyrhiza 9346	0.588499	±	0.0936857	2.12149	±	0.305531	0.637898	±	0.0776635	0.57999	±	0.0481051	30.4256	±	1.90376
Spirodela polyrhiza 9509	0.743694	±	0.0669296	3.53455	±	0.28939	0.599223	±	0.060601	0.0266743	±	0.00986169	33.8228	±	3.15685
Spirodela polyrhiza 9264	0.737851	±	0.0818433	2.75844	±	0.225061	0.952524	±	0.0931473	0.490641	±	0.0456515	16.8071	±	1.68363
Spirodela intermedia 7355	1.57126	±	0.17155	3.55807	±	0.3605	0.330743	±	0.0697427	0.633201	±	0.0459462	61.8825	±	1.5039
Landoltia punctata 7488	0.663328	±	0.0524736	1.29737	±	0.136545	0.419902	±	0.0494634	0.967282	±	0.123413	32.8054	±	2.24385
Landoltia punctata 7624	0.793785	±	0.0775554	2.94375	±	0.150733	1.08963	±	0.0695351	1.10879	±	0.0714741	41.0959	±	1.89417
Landoltia punctata 7776	0.078	±	0.0236291	0.157	±	0.0601193	0.0166667	±	0.00366667	0.0233333	±	0.0120185	11.443	±	0.815117
Lemna yungensis 9208	1.10107	±	0.0973108	3.94257	±	0.235641	1.20199	±	0.109161	0.175209	±	0.0724881	55.7778	±	4.18951
Lemna minor 8627	5.648	±	0.32	5.063	±	0.319553	0.128	±	0.06	0.02	±	0.01	97.4727	±	3.66334
Lemna gibba DWC112	0.840695	±	0.101063	3.74539	±	0.263099	1.69506	±	0.0909489	0.0409289	±	0.0326061	138.503	±	8.37458
Lemna gibba DWC128	0.542782	±	0.0918974	2.19494	±	0.310808	0.749962	±	0.116711	0.00701518	±	0.00492058	30.3703	±	1.00208
Lemna japonica 8695	0.643567	±	0.0239274	2.73761	±	0.0705812	0.783101	±	0.0582034	0.0117746	±	0.00455287	42.9404	±	4.09853
Lemna obscura 9342	0.949212	±	0.0490066	3.54647	±	0.154421	1.47417	±	0.05108	0.577777	±	0.0141343	38.4934	±	1.42274
Average Lemnoideae	1.16212			3.1349			0.75049			0.345126			48.0274
Wolffioideae
Wolffiella neotropica 8848	0.927873	±	0.0614879	3.13485	±	0.17805	0.797315	±	0.0474924	0.107778	±	0.101875	103.734	±	1.25
Wolffiella caudata 9139	0.57103	±	0.0447236	3.22508	±	0.685624	3.26911	±	0.21451	0.0019802	±	0.0019802	97.2025	±	14.0248
Wolffiella gladiata 8261	3.32843	±	0.331522	9.86289	±	0.795215	1.0916	±	0.146505	0.0953682	±	0.0542457	81.9099	±	1.54705
Wolffia borealis 9144	1.11423	±	0.537542	3.82376	±	1.37068	0.470575	±	0.181561	0.142808	±	0.0369966	111.162	±	3.81639
Wolffia globosa 884	1.10089	±	0.105537	4.02809	±	0.306375	1.04102	±	0.0869388	0.394797	±	0.193593	139.11	±	3.76475
Wolffia globosa 8973	1.51251	±	1.00635	3.39494	±	1.48095	2.76271	±	2.36343	0.0317762	±	0.0167818	111.55	±	1.68187
Wolffia arrhiza 8853	0.386232	±	0.0390134	1.85572	±	0.262517	0.973085	±	0.0611241	0.0339208	±	0.0227105	103.621	±	3.86942
Average Wolffioideae	1.27731			4.18934			1.48649			0.11549			106.898
p-value	2*10-16			4.83*10-15			0.0108			2*10-16			2*10-16

## Sheet: Mono
	STRUCTURAL CARBOHYDRATES (µg.mg-1 DW)
Species	Fucose			Arabinose			Galactose			Rhamnose			Glucose			Xylose			Mannose			Apiose
Lemnoideae
Spirodela polyrhiza 7498	1.61579	±	0.22048	14.6574	±	1.22639	21.2727	±	1.51951	5.09943	±	0.490718	4.899	±	0.334239	13.9472	±	0.679546	11.4864	±	0.673025	44.3259	±	4.2944
Spirodela polyrhiza 9346	0.779726	±	0.177673	6.87939	±	0.552166	11.7652	±	0.671758	3.64484	±	0.246112	3.4367	±	0.290931	30.2878	±	0.300419	6.69353	±	0.829026	101.845	±	17.1322
Spirodela polyrhiza 9509	2.33077	±	0.166182	15.1583	±	0.926328	20.2573	±	1.22635	5.1817	±	0.317059	6.27277	±	0.486445	11.3461	±	0.548441	8.89017	±	0.63493	35.7155	±	2.3475
Spirodela polyrhiza 9264	1.60803	±	0.425211	13.7413	±	2.07672	20.0406	±	3.22662	3.29133	±	0.720095	3.52953	±	0.684651	28.9507	±	1.44299	9.75272	±	1.51007	87.8024	±	12.8001
Spirodela intermedia 7355	1.67741	±	0.108763	22.8816	±	0.410687	19.8501	±	0.252048	4.3811	±	0.119799	7.80868	±	0.221736	10.279	±	0.112719	5.84566	±	0.262363	42.6474	±	1.40389
Landoltia punctata 7488	0.825517	±	0.0602846	11.0096	±	0.446826	15.6104	±	0.533181	2.81901	±	0.149952	3.49836	±	0.146927	21.8219	±	0.238446	8.37132	±	0.822603	69.38	±	3.53606
Landoltia punctata 7624	2.02729	±	0.065532	12.6685	±	0.363889	16.8727	±	0.496996	3.70558	±	0.116273	5.05619	±	0.123767	25.2643	±	0.222263	7.65044	±	0.347307	86.9251	±	3.10881
Landoltia punctata 7776	0.961132	±	0.174725	13.0284	±	0.497324	13.8226	±	0.589752	2.73824	±	0.199045	2.7711	±	0.275262	27.0696	±	0.263745	6.26773	±	0.531526	97.2404	±	4.34378
Lemna yungensis 9208	1.61496	±	0.0567135	11.4871	±	0.182662	13.9016	±	0.164426	4.2717	±	0.0771506	7.64156	±	0.193403	21.476	±	0.0735336	8.41061	±	0.299478	84.6535	±	1.6325
Lemna minor 8627	0.685052	±	0.137855	6.2816	±	0.357811	11.2616	±	0.560907	2.45196	±	0.190908	5.00041	±	0.433573	27.9192	±	0.250845	6.86716	±	0.469914	106.825	±	5.59673
Lemna gibba DWC112	1.26297	±	0.428358	10.166	±	1.4073	18.0727	±	2.25414	4.16664	±	0.721647	12.1977	±	2.26502	31.429	±	1.00808	11.3717	±	1.85187	98.5634	±	12.8768
Lemna gibba DWC128	0.622257	±	0.135351	7.71658	±	0.532241	12.0056	±	0.751807	2.33548	±	0.207125	2.99429	±	0.3222	23.5648	±	0.336218	8.16983	±	0.204207	91.5645	±	5.76553
Lemna japonica 8695	1.12999	±	0.103949	7.79721	±	0.357269	12.2916	±	0.496669	2.41718	±	0.144752	2.17129	±	0.11543	24.7552	±	0.222117	6.51767	±	0.262573	87.9574	±	3.85118
Lemna obscura 9342	0.916407	±	0.165633	9.65132	±	0.586725	14.1917	±	0.841062	2.62199	±	0.225912	2.7883	±	0.235712	25.4648	±	0.376134	7.72179	±	0.429822	85.2723	±	5.55831
Average Lemnoideae	1.28981			11.6517			15.8012			3.50901			5.00471			23.1126			8.14405			80.0513
Wolffioideae
Wolffiella neotropica 8848	5.39835	±	0.268304	23.5627	±	4.15621	15.5601	±	2.79677	4.45736	±	0.36148	10.5613	±	2.19911	18.856	±	1.25075	7.91842	±	0.515893	21.4124	±	1.24974
Wolffiella caudata 9139	1.58897	±	0.0654552	37.6974	±	1.53208	15.6524	±	0.547779	2.61466	±	0.106664	11.1149	±	0.382846	20.5821	±	0.244974	6.68162	±	0.310948	27.7348	±	1.24876
Wolffiella gladiata 8261	1.16897	±	0.321693	44.0325	±	5.6942	18.4537	±	2.93688	2.47984	±	0.528179	11.2309	±	1.99491	24.3058	±	1.31341	8.27687	±	1.12764	31.7645	±	4.84751
Wolffia borealis 9144	1.51862	±	0.105566	24.8165	±	0.697505	13.3066	±	0.659264	2.09741	±	0.15379	7.47307	±	0.230088	25.9471	±	0.294832	9.03333	±	0.562879	9.09119	±	1.15108
Wolffia globosa 884	5.46467	±	0.430806	28.7549	±	1.89086	18.6043	±	1.11805	4.59802	±	0.377263	10.4352	±	0.566878	16.9017	±	0.500006	8.5578	±	0.382838	15.7542	±	1.13129
Wolffia globosa 8973	1.09554	±	0.11298	23.7918	±	1.23102	12.2448	±	0.497525	1.66433	±	0.135288	10.3834	±	0.596975	22.9815	±	0.2225	9.65461	±	0.439956	15.054	±	1.3463
Wolffia arrhiza 8853	0.328453	±	0.093459	20.5057	±	1.1285	12.7774	±	0.753808	2.56249	±	0.192144	9.26347	±	0.556237	26.5755	±	0.337113	7.16023	±	0.693011	16.6157	±	0.759079
Average Wolffioideae	2.36623			29.0231			15.2285			2.92487			10.066			22.3071			8.18327			19.6324
p-value	2*10-16			2*10-16			2*10-16			7.95*10-15			2*10-16			7.7*10-14			2.68*10-16			2*10-16

## Sheet: essencial
	Essential amino acids (µg.mg-1)																													Essential amino acids (mg.mg-1)
	Species	HIS			TRP			MET			VAL			PHE			ILE			LEU			LYS			ALA+TIR				Species	HIS			TRP			MET			VAL			PHE			ILE			LEU
	Lemnoideae																													Lemnoideae
Lemnoideae	Spirodela polyrhiza 7498	0.504124	±	0.291056	0.449923	±	0.259763	0.101351	±	0.0585148	3.53011	±	2.03811	0.439572	±	0.253787	1.19931	±	0.692423	0.613836	±	0.354398	1.12336	±	0.64857	10.4865	±	6.05438		Spirodela polyrhiza 7498	504.124	±	291.056	449.923	±	259.763	101.351	±	58.5148	3530.11	±	2038.11	439.572	±	253.787	1199.31	±	692.423	613.836
	Spirodela polyrhiza 9346	0.399063	±	0.230399	2.04455	±	1.18042	0.138311	±	0.079854	0.622796	±	0.359571	0.105551	±	0.0609399	0.450922	±	0.26034	0.23727	±	0.136988	0.189015	±	0.109128	4.06844	±	2.34891		Spirodela polyrhiza 9346	399.063	±	230.399	2044.55	±	1180.42	138.311	±	79.854	622.796	±	359.571	105.551	±	60.9399	450.922	±	260.34	237.27
	Spirodela polyrhiza 9509	0.314818	±	0.18176	0.258982	±	0.149523	0.0675018	±	0.0389722	3.24226	±	1.87192	0.757187	±	0.437162	1.39141	±	0.80333	1.04814	±	0.605143	3.00289	±	1.73372	7.83036	±	4.52086		Spirodela polyrhiza 9509	314.818	±	181.76	258.982	±	149.523	67.5018	±	38.9722	3242.26	±	1871.92	757.187	±	437.162	1391.41	±	803.33	1048.14
	Spirodela polyrhiza 9264	0.338629	±	0.195507	0.275349	±	0.158973	0.305913	±	0.176619	0.265668	±	0.153383	0.406069	±	0.234444	0.153246	±	0.0884768	0.0923209	±	0.0533015	0.238168	±	0.137506	0.986582	±	0.569603		Spirodela polyrhiza 9264	338.629	±	195.507	275.349	±	158.973	305.913	±	176.619	265.668	±	153.383	406.069	±	234.444	153.246	±	88.4768	92.3209
	Spirodela intermedia 7355	0.94823	±	0.547461	0.61692	±	0.356179	0.122022	±	0.0704492	1.2787	±	0.738256	0.863796	±	0.498713	1.46521	±	0.845941	1.12634	±	0.650294	3.20652	±	1.85128	2.49746	±	1.44191		Spirodela intermedia 7355	948.23	±	547.461	616.92	±	356.179	122.022	±	70.4492	1278.7	±	738.256	863.796	±	498.713	1465.21	±	845.941	1126.34
	Landoltia punctata 7488	0.250854	±	0.144831	0.856438	±	0.494465	0.303969	±	0.175497	0.588369	±	0.339695	0.564743	±	0.326055	0.379946	±	0.219362	0.311231	±	0.179689	1.76014	±	1.01622	2.89021	±	1.66866		Landoltia punctata 7488	250.854	±	144.831	856.438	±	494.465	303.969	±	175.497	588.369	±	339.695	564.743	±	326.055	379.946	±	219.362	311.231
	Landoltia punctata 7624	0.31462	±	0.181646	0.153014	±	0.0883428	0.0150083	±	0.00866503	0.939318	±	0.542315	0.341696	±	0.197278	0.481885	±	0.278216	0.409306	±	0.236313	0.560388	±	0.32354	4.87972	±	2.81731		Landoltia punctata 7624	314.62	±	181.646	153.014	±	88.3428	15.0083	±	8.66503	939.318	±	542.315	341.696	±	197.278	481.885	±	278.216	409.306
	Landoltia punctata 7776	0.269413	±	0.155546	0.070613	±	0.0407684	0.0364112	±	0.021022	0.499321	±	0.288283	0.150698	±	0.0870056	0.180873	±	0.104427	0.518557	±	0.299389	1.37233	±	0.792313	1.27206	±	0.734423		Landoltia punctata 7776	269.413	±	155.546	70.613	±	40.7684	36.4112	±	21.022	499.321	±	288.283	150.698	±	87.0056	180.873	±	104.427	518.557
	Lemna yungensis 9208	0.485364	±	0.280225	0.112098	±	0.06472	0.0962732	±	0.0555833	0.671427	±	0.387649	0.16783	±	0.0968967	0.404358	±	0.233456	0.266165	±	0.15367	0.451037	±	0.260406	2.59147	±	1.49619		Lemna yungensis 9208	485.364	±	280.225	112.098	±	64.72	96.2732	±	55.5833	671.427	±	387.649	167.83	±	96.8967	404.358	±	233.456	266.165
	Lemna minor 8627	0	±	0	2.1145	±	1.2208	0.026632	±	0.015376	0.938458	±	0.541819	0.629673	±	0.363542	0.595967	±	0.344082	0.674705	±	0.389541	1.65715	±	0.956757	5.09678	±	2.94263		Lemna minor 8627	0	±	0	2114.5	±	1220.8	26.632	±	15.376	938.458	±	541.819	629.673	±	363.542	595.967	±	344.082	674.705
	Lemna gibba DWC112	1.59084	±	0.918474	0.247341	±	0.142802	0.141709	±	0.0818155	1.66194	±	0.959523	0.406277	±	0.234564	0.764146	±	0.44118	0.491297	±	0.28365	3.40115	±	1.96366	3.96358	±	2.28838		Lemna gibba DWC112	1590.84	±	918.474	247.341	±	142.802	141.709	±	81.8155	1661.94	±	959.523	406.277	±	234.564	764.146	±	441.18	491.297
	Lemna gibba DWC128	0.629687	±	0.36355	0.610633	±	0.352549	0.0739766	±	0.0427104	1.24103	±	0.716509	1.08019	±	0.62365	0.881648	±	0.50902	0.641056	±	0.370114	1.30213	±	0.751785	6.53909	±	3.77535		Lemna gibba DWC128	629.687	±	363.55	610.633	±	352.549	73.9766	±	42.7104	1241.03	±	716.509	1080.19	±	623.65	881.648	±	509.02	641.056
	Lemna japonica 8695	0.00366435	±	0.00211561	0.282652	±	0.163189	0.109169	±	0.0630287	0.93705	±	0.541006	0.539098	±	0.311248	0.172925	±	0.0998385	0.210844	±	0.121731	1.55086	±	0.895391	2.74246	±	1.58336		Lemna japonica 8695	3.66435	±	2.11561	282.652	±	163.189	109.169	±	63.0287	937.05	±	541.006	539.098	±	311.248	172.925	±	99.8385	210.844
	Lemna obscura 9342	0.55093	±	0.318079	0.281595	±	0.162579	0.0509246	±	0.0294013	0.988994	±	0.570996	0.75584	±	0.436385	0.668189	±	0.385779	1.34552	±	0.776838	0.83034	±	0.479397	3.17364	±	1.8323		Lemna obscura 9342	550.93	±	318.079	281.595	±	162.579	50.9246	±	29.4013	988.994	±	570.996	755.84	±	436.385	668.189	±	385.779	1345.52
																														Average Lemnoideae	471.446			598.186			113.512			1243.25			514.873			656.431			570.471
	Wolffioideae																													Wolffioideae
Wolffioideae	Wolffiella neotropica 8848	0.469811	±	0.271246	0.184057	±	0.106265	0.0465412	±	0.0268706	0.963135	±	0.556066	0.363612	±	0.209931	0.257927	±	0.148914	0.391064	±	0.225781	0.693285	±	0.400269	1.35384	±	0.781643		Wolffiella neotropica 8848	469.811	±	271.246	184.057	±	106.265	46.5412	±	26.8706	963.135	±	556.066	363.612	±	209.931	257.927	±	148.914	391.064
	Wolffiella caudata 9139	1.14072	±	0.658592	0.778665	±	0.449563	0.0495793	±	0.0286246	0.802168	±	0.463132	0.144421	±	0.0833816	0.499727	±	0.288518	0.302006	±	0.174363	2.7548	±	1.59049	8.64811	±	4.99299		Wolffiella caudata 9139	1140.72	±	658.592	778.665	±	449.563	49.5793	±	28.6246	802.168	±	463.132	144.421	±	83.3816	499.727	±	288.518	302.006
	Wolffiella gladiata 8261	7.04611	±	4.06808	2.9766	±	1.71854	0.139584	±	0.0805887	2.65726	±	1.53417	0.511535	±	0.295335	1.85561	±	1.07134	1.88287	±	1.08708	2.43532	±	1.40603	10.8856	±	6.28482		Wolffiella gladiata 8261	7046.11	±	4068.08	2976.6	±	1718.54	139.584	±	80.5887	2657.26	±	1534.17	511.535	±	295.335	1855.61	±	1071.34	1882.87
	Wolffia borealis 9144	0.233295	±	0.134693	0.147707	±	0.0852788	0.0879898	±	0.0508009	0.241955	±	0.139693	0.0417212	±	0.0240877	0.226098	±	0.130538	0.158294	±	0.0913911	0.880027	±	0.508084	1.09871	±	0.634343		Wolffia borealis 9144	233.295	±	134.693	147.707	±	85.2788	87.9898	±	50.8009	241.955	±	139.693	41.7212	±	24.0877	226.098	±	130.538	158.294
	Wolffia globosa 884	0.281364	±	0.162445	0.155964	±	0.0900456	0.0850734	±	0.0491172	1.08138	±	0.624334	0.367524	±	0.21219	0.746743	±	0.431133	0.729533	±	0.421196	3.16659	±	1.82823	6.58107	±	3.79958		Wolffia globosa 884	281.364	±	162.445	155.964	±	90.0456	85.0734	±	49.1172	1081.38	±	624.334	367.524	±	212.19	746.743	±	431.133	729.533
	Wolffia globosa 8973	0.335731	±	0.193834	0.072774	±	0.0420161	0.0189771	±	0.0109564	0.22582	±	0.130377	0.156523	±	0.0903685	0.140706	±	0.0812364	0.338965	±	0.195702	0.553357	±	0.319481	0.588915	±	0.34001		Wolffia globosa 8973	335.731	±	193.834	72.774	±	42.0161	18.9771	±	10.9564	225.82	±	130.377	156.523	±	90.3685	140.706	±	81.2364	338.965
	Wolffia arrhiza 8853	0.602759	±	0.348003	0.136212	±	0.0786418	0.0505699	±	0.0291965	0.721057	±	0.416303	0.0715541	±	0.0413118	0.180449	±	0.104182	0.143064	±	0.0825981	0.856389	±	0.494436	5.76551	±	3.32872		Wolffia arrhiza 8853	602.759	±	348.003	136.212	±	78.6418	50.5699	±	29.1965	721.057	±	416.303	71.5541	±	41.3118	180.449	±	104.182	143.064
																														Average Wolffioideae	1444.26			635.997			68.3306			956.111			236.699			558.18			563.685
	p-value	5.5*10-4			2.1*10-16			8.4*10-5			1.6*10-7			4.6*10-12			6.1*10-7			2.3*10-4			6.2*10-7			3.2*10-15				p-value	5.5*10-4			2.1*10-16			8.4*10-5			1.6*10-7			4.6*10-12			6.1*10-7			2.3*10-4
[truncated: 8 more columns]

## Sheet: nao essencial
	Non-essential amino acids (µg.mg-1)																																				Non-essential amino acids (mg.mg-1)
	Species	ASP			GLU			ASN			SER			GLN			GLY			CIT			THR			ARG			GABA			ORN					Species	ASP			GLU			ASN			SER
																																					Lemnoideae
Lemnoideae	Spirodela polyrhiza 7498	2.75587	±	1.5911	9.08351	±	5.24437	22.1022	±	12.7607	2.07155	±	1.19601	0.418229	±	0.241464	0.444608	±	0.256694	4.77838	±	2.7588	0.136246	±	0.0786616	1.88203	±	1.08659	7.81258	±	4.51059	0.759745	±	0.438639		Lemnoideae	Spirodela polyrhiza 7498	2755.87	±	1591.1	9083.51	±	5244.37	22102.2	±	12760.7	2071.55	±	1196.01
	Spirodela polyrhiza 9346	4.70887	±	2.71867	15.1707	±	8.75881	64.2392	±	37.0885	2.5913	±	1.49609	0.750301	±	0.433187	0.155026	±	0.0895045	1.60821	±	0.9285	0.648336	±	0.374317	3.27407	±	1.89029	0.164276	±	0.094845	0.326578	±	0.18855			Spirodela polyrhiza 9346	4708.87	±	2718.67	15170.7	±	8758.81	64239.2	±	37088.5	2591.3	±	1496.09
	Spirodela polyrhiza 9509	26.9233	±	5.21721	10.5175	±	6.07227	37.4483	±	21.6208	2.00214	±	1.15594	2.27157	±	1.31149	0.336339	±	0.194185	5.29976	±	3.05982	0.602488	±	0.347847	0.57681	±	0.333021	1.59678	±	0.921901	0.603808	±	0.348609			Spirodela polyrhiza 9509	26923.3	±	5217.21	10517.5	±	6072.27	37448.3	±	21620.8	2002.14	±	1155.94
	Spirodela polyrhiza 9264	5.52307	±	3.18875	2.38536	±	1.37719	8.07654	±	4.66299	0.933434	±	0.538919	0.431799	±	0.249299	0.131066	±	0.0756711	0.306058	±	0.176703	0.637512	±	0.368068	0.0296926	±	0.017143	0.357486	±	0.206394	0.470195	±	0.271467			Spirodela polyrhiza 9264	5523.07	±	3188.75	2385.36	±	1377.19	8076.54	±	4662.99	933.434	±	538.919
	Spirodela intermedia 7355	13.3353	±	7.69915	5.6196	±	3.24448	35.9752	±	20.7703	2.64035	±	1.52441	1.27569	±	0.736519	0.551189	±	0.318229	3.19321	±	1.8436	0.765155	±	0.441762	3.90727	±	2.25587	3.68893	±	2.1298	1.78417	±	1.03009			Spirodela intermedia 7355	13335.3	±	7699.15	5619.6	±	3244.48	35975.2	±	20770.3	2640.35	±	1524.41
	Landoltia punctata 7488	9.21602	±	5.32087	9.59175	±	5.5378	41.0391	±	23.6939	0.979221	±	0.565353	0.503801	±	0.29087	0.465909	±	0.268992	0.704948	±	0.407002	0.774971	±	0.44743	8.69982	±	5.02284	1.01637	±	0.586804	0.717078	±	0.414005			Landoltia punctata 7488	9216.02	±	5320.87	9591.75	±	5537.8	41039.1	±	23693.9	979.221	±	565.353
	Landoltia punctata 7624	16.1519	±	9.32528	6.41232	±	3.70215	21.5145	±	12.4214	2.64935	±	1.5296	0.664794	±	0.383819	0.19961	±	0.115245	3.36792	±	1.94447	0.509768	±	0.294315	0.645666	±	0.372776	2.1489	±	1.24067	0.601692	±	0.347387			Landoltia punctata 7624	16151.9	±	9325.28	6412.32	±	3702.15	21514.5	±	12421.4	2649.35	±	1529.6
	Landoltia punctata 7776	9.608	±	5.54718	1.70971	±	0.987099	45.1284	±	26.0549	0.216098	±	0.124764	0.706433	±	0.407859	0.624923	±	0.360799	0.930413	±	0.537174	0.368878	±	0.212972	3.1804	±	1.8362	0.691336	±	0.399143	1.41248	±	0.815496			Landoltia punctata 7776	9608	±	5547.18	1709.71	±	987.099	45128.4	±	26054.9	216.098	±	124.764
	Lemna yungensis 9208	9.08898	±	5.24752	6.99361	±	4.03776	6.83616	±	3.94686	1.26804	±	0.732104	0.322474	±	0.18618	0.214133	±	0.12363	2.07517	±	1.1981	0.063533	±	0.0366808	0.0808258	±	0.0466648	1.19884	±	0.692153	0.10179	±	0.0587688			Lemna yungensis 9208	9088.98	±	5247.52	6993.61	±	4037.76	6836.16	±	3946.86	1268.04	±	732.104
	Lemna minor 8627	4.58291	±	2.64595	3.63293	±	2.09747	41.3223	±	23.8574	1.15292	±	0.665641	6.15848	±	3.5556	0.123416	±	0.0712543	1.53087	±	0.883848	0.427639	±	0.246898	12.1701	±	7.02638	7.80196	±	4.50446	1.92385	±	1.11074			Lemna minor 8627	4582.91	±	2645.95	3632.93	±	2097.47	41322.3	±	23857.4	1152.92	±	665.641
	Lemna gibba DWC112	29.3493	±	16.9448	8.45315	±	4.88043	42.3664	±	24.4602	3.69473	±	2.13315	0.883382	±	0.510021	0.722734	±	0.41727	1.37999	±	0.796736	0.67074	±	0.387252	5.79514	±	3.34583	5.19628	±	3.00007	0.551148	±	0.318206			Lemna gibba DWC112	29349.3	±	16944.8	8453.15	±	4880.43	42366.4	±	24460.2	3694.73	±	2133.15
	Lemna gibba DWC128	23.7302	±	13.7006	8.60378	±	4.9674	42.4277	±	24.4956	1.54312	±	0.89092	0.241294	±	0.139311	0.465656	±	0.268847	2.71731	±	1.56884	0.145143	±	0.0837983	11.133	±	6.42764	1.22468	±	0.707071	1.41833	±	0.818871			Lemna gibba DWC128	23730.2	±	13700.6	8603.78	±	4967.4	42427.7	±	24495.6	1543.12	±	890.92
	Lemna japonica 8695	5.90918	±	3.41167	6.30494	±	3.64016	9.90444	±	5.71833	0.427477	±	0.246804	0.773685	±	0.446687	0.547616	±	0.316166	1.5078	±	0.870528	0.261293	±	0.150858	0.645076	±	0.372435	1.61691	±	0.933522	0.443121	±	0.255836			Lemna japonica 8695	5909.18	±	3411.67	6304.94	±	3640.16	9904.44	±	5718.33	427.477	±	246.804
	Lemna obscura 9342	7.02768	±	4.05744	3.59611	±	2.07622	5.24469	±	3.02803	1.06707	±	0.616073	0.198177	±	0.114418	0.241938	±	0.139683	1.10316	±	0.636909	0.155976	±	0.0900526	0.798972	±	0.461287	0.236315	±	0.136436	0.0824285	±	0.0475901			Lemna obscura 9342	7027.68	±	4057.44	3596.11	±	2076.22	5244.69	±	3028.03	1067.07	±	616.073
																																					Average Lemnoideae	11993.6			7005.35			30258.9			1659.77
																																					Wolffoideae
Wolffioideae	Wolffiella neotropica 8848	4.39824	±	2.53932	3.98982	±	2.30352	9.91036	±	5.72175	0.376769	±	0.217527	0.129243	±	0.0746184	0.335658	±	0.193792	0.873487	±	0.504308	0.114476	±	0.0660925	2.53866	±	1.46569	0.801629	±	0.462821	0.660761	±	0.381491		Wolffioideae	Wolffiella neotropica 8848	4398.24	±	2539.32	3989.82	±	2303.52	9910.36	±	5721.75	376.769	±	217.527
	Wolffiella caudata 9139	6.2287	±	3.59614	6.47987	±	3.74115	104.53	±	60.3506	2.44392	±	1.411	1.14694	±	0.662188	1.16509	±	0.672665	2.48652	±	1.43559	0.547551	±	0.316129	22.0325	±	12.7205	9.30646	±	5.37308	0.399151	±	0.23045			Wolffiella caudata 9139	6228.7	±	3596.14	6479.87	±	3741.15	104530	±	60350.6	2443.92	±	1411
	Wolffiella gladiata 8261	9.452	±	5.45712	5.3196	±	3.07128	70.7431	±	40.8435	4.71321	±	2.72117	3.10967	±	1.79537	0.703052	±	0.405907	10.2425	±	5.91348	1.14537	±	0.661278	16.8165	±	9.70904	5.41218	±	3.12473	2.01632	±	1.16412			Wolffiella gladiata 8261	9452	±	5457.12	5319.6	±	3071.28	70743.1	±	40843.5	4713.21	±	2721.17
	Wolffia borealis 9144	5.30708	±	3.06405	0.959924	±	0.554212	15.9743	±	9.22275	0.534262	±	0.308456	0.243597	±	0.140641	0.206787	±	0.119388	0.506291	±	0.292307	0.255378	±	0.147443	0.845186	±	0.487969	0.830024	±	0.479214	1.17046	±	0.675768			Wolffia borealis 9144	5307.08	±	3064.05	959.924	±	554.212	15974.3	±	9222.75	534.262	±	308.456
	Wolffia globosa 884	16.4648	±	9.50595	17.9202	±	10.3462	28.1362	±	16.2444	2.02608	±	1.16976	0.770696	±	0.444962	0.581249	±	0.335585	0.954753	±	0.551227	0.751076	±	0.433634	4.2742	±	2.46771	3.00899	±	1.73724	0.476569	±	0.275147			Wolffia globosa 884	16464.8	±	9505.95	17920.2	±	10346.2	28136.2	±	16244.4	2026.08	±	1169.76
	Wolffia globosa 8973	2.08671	±	1.20476	1.82724	±	1.05496	7.51441	±	4.33845	0.192786	±	0.111305	0.062808	±	0.0362622	0.0148474	±	0.00857217	0.245581	±	0.141786	0.0456614	±	0.0263626	0.292493	±	0.168871	0.221558	±	0.127917	0.226807	±	0.130947			Wolffia globosa 8973	2086.71	±	1204.76	1827.24	±	1054.96	7514.41	±	4338.45	192.786	±	111.305
	Wolffia arrhiza 8853	3.7535	±	2.16708	4.39943	±	2.54001	15.2664	±	8.81406	1.93784	±	1.11881	0.45335	±	0.261742	0.12582	±	0.0726419	0.820752	±	0.473862	0.444624	±	0.256704	0.671918	±	0.387932	0.744836	±	0.430032	0.186494	±	0.107672			Wolffia arrhiza 8853	3753.5	±	2167.08	4399.43	±	2540.01	15266.4	±	8814.06	1937.84	±	1118.81
																																					Average Wolffioideae	6813			5842.29			36010.7			1746.41
	p-value	9.4*10-16			2.5*10-13			2.0*10-16			3.5*10-10			2.0*10-16			7.6*10-10			7.2*10-6			2.8*10-8			2.0*10-16			3.9*10-8			1.4*10-13					p-value	9.4*10-16			2.5*10-13			2.0*10-16			3.5*10-10
[truncated: 21 more columns]

## Sheet: 2 met
		(µg.mg-1 DW)								(mg.mg-1 DW)
	Species	Total phenolics			Tannins				Species	Total phenolics			Tannins
									Lemnoideae
Lemnoideae	Spirodela polyrhiza 7498	0.0360819	±	0.00366747	0.0218944	±	0.00200893		Spirodela polyrhiza 7498	36.0819	±	3.66747	21.8944	±	2.00893
	Spirodela polyrhiza 9346	0.0291519	±	0.00444808	0.0241517	±	0.000892136		Spirodela polyrhiza 9346	29.1519	±	4.44808	24.1517	±	0.892136
	Spirodela polyrhiza 9509	0.0488088	±	0.00269854	0.0161847	±	0.000907557		Spirodela polyrhiza 9509	48.8088	±	2.69854	16.1847	±	0.907557
	Spirodela polyrhiza 9264	0.0791658	±	0.00343853	0.0190469	±	0.00105062		Spirodela polyrhiza 9264	79.1658	±	3.43853	19.0469	±	1.05062
	Spirodela intermedia 7355	0.0760059	±	0.00537634	0.0150634	±	0.000763562		Spirodela intermedia 7355	76.0059	±	5.37634	15.0634	±	0.763562
	Landoltia punctata 7488	0.0241178	±	0.00358065	0.0291089	±	0.00220116		Landoltia punctata 7488	24.1178	±	3.58065	29.1089	±	2.20116
	Landoltia punctata 7624	0.0382394	±	0.00258965	0.0168044	±	0.00161237		Landoltia punctata 7624	38.2394	±	2.58965	16.8044	±	1.61237
	Landoltia punctata 7776	0.053516	±	0.00420384	0.024314	±	0.00286555		Landoltia punctata 7776	53.516	±	4.20384	24.314	±	2.86555
	Lemna yungensis 9208	0.0458886	±	0.00203926	0.019283	±	0.00107119		Lemna yungensis 9208	45.8886	±	2.03926	19.283	±	1.07119
	Lemna minor 8627	0.0320721	±	0.00285216	0.00236058	±	0.000166592		Lemna minor 8627	32.0721	±	2.85216	2.36058	±	0.166592
	Lemna gibba DWC112	0.0411378	±	0.00342157	0.0180437	±	0.000568349		Lemna gibba DWC112	41.1378	±	3.42157	18.0437	±	0.568349
	Lemna gibba DWC128	0.0839166	±	0.00276357	0.0273532	±	0.00173086		Lemna gibba DWC128	83.9166	±	2.76357	27.3532	±	1.73086
	Lemna japonica 8695	0.0488306	±	0.00576181	0.0210091	±	0.00373148		Lemna japonica 8695	48.8306	±	5.76181	21.0091	±	3.73148
	Lemna obscura 9342	0.0455181	±	0.00143194	0.018265	±	0.00142367		Lemna obscura 9342	45.5181	±	1.43194	18.265	±	1.42367
									Average Lemnoideae	48.7465			19.4916
									Wolffioideae
Wolffioideae	Wolffiella neotropica 8848	0.0355371	±	0.00439764	0.0169667	±	0.00173708		Wolffiella neotropica 8848	35.5371	±	4.39764	16.9667	±	1.73708
	Wolffiella caudata 9139	0.0240306	±	0.00288482	0.0168486	±	0.00102524		Wolffiella caudata 9139	24.0306	±	2.88482	16.8486	±	1.02524
	Wolffiella gladiata 8261	0.0572425	±	0.00418871	0.0211714	±	0.000517429		Wolffiella gladiata 8261	57.2425	±	4.18871	21.1714	±	0.517429
	Wolffia borealis 9144	0.0293698	±	0.00288173	0.0161405	±	0.000650415		Wolffia borealis 9144	29.3698	±	2.88173	16.1405	±	0.650415
	Wolffia globosa 884	0.055194	±	0.00242534	0.0199616	±	0.00144076		Wolffia globosa 884	55.194	±	2.42534	19.9616	±	1.44076
	Wolffia globosa 8973	0.0536031	±	0.0026992	0.017247	±	0.00372353		Wolffia globosa 8973	53.6031	±	2.6992	17.247	±	3.72353
	Wolffia arrhiza 8853	0.0452566	±	0.00193868	0.03144	±	0.00674433		Wolffia arrhiza 8853	45.2566	±	1.93868	31.44	±	6.74433
									Average Wolffioideae	42.8905			19.968
	p-value	2*10-16			9.96*10-11				p-value	2*10-16			9.96*10-11

## Sheet: frequencia
only meta
Variable	Works	Spirodela	Landoltia	Lemna	Wolffiella	Wolffia	Ocorrence		Variable	Works	Spirodela	Landoltia	Lemna	Wolffiella	Wolffia	Ocurrence
Amino acids	21	6	2	19	1	23	51		Amino acids*	22	11	5	25	4	27	72
Ash	20	12	0	15	0	21	48		Ash	20	12	0	15	0	21	48
Carbohydrate	9	2	0	7	0	1	10		Carbohydrate	8	2	0	6	0	0	8
Cell wall	3	0	0	3	0	0	3		Cell wall	9	3	1	7	1	1	13
Energy	7	1	0	7	0	0	8		Energy	7	1	0	7	0	0	8
Fat	20	16	2	12	1	20	51		Fat	21	18	3	24	8	28	81
Fiber	20	10	0	21	0	6	37		Fiber*	21	15	3	27	3	10	58
Minerals	16	1	1	17	0	16	35		Minerals	13	1	0	7	0	16	24
Monosaccharides	7	1	2	4	1	1	9		Monosaccharides*	8	7	7	12	5	6	37
Protein	43	20	6	41	1	25	93		Protein*	43	25	9	47	4	29	114
Starch	22	9	13	17	3	19	61		Starch*	23	14	16	23	6	23	82
Tannin	1	3	0	0	0	0	3		Tannin*	2	8	3	6	3	4	24
	Total	81	26	163	7	132	409		Total	197	117	47	206	34	165	569
